# Supplementary material for: Cationic substitution engineering induces a new quaternary chalcogenide in the A–MIIIA–MIVA–Q system for optical crystal applications
Source: Royal Society of Chemistry journal article supplement (doi:10.1039/d5ce00016e), 2025-01-01
Supplement: d5ce00016e1.pdf [file d5ce00016e1.pdf]

# Cationic Substitution Engineering Induced New Quaternary Chalcogenide in A–M<sup>III</sup>A–M<sup>IV</sup>A–Q System Used for Optical Crystal

Yue Wang<sup>a, b\*</sup>, Xuezhong Li<sup>c</sup>, Zihao Lou<sup>a</sup>, Yongfang Shi<sup>b\*</sup>

<sup>a</sup> School of Chemical and Biological Technology, Minjiang Teachers College, Fuzhou 350108, China

<sup>b</sup> Fujian Institute of Research on the Structure of Matter, State Key Laboratory of Structural Chemistry, Chinese Academy of Sciences, Fuzhou 350108, China

<sup>c</sup> School of Mechanical Engineering, Anyang Institute of Technology, Anyang 455000, China

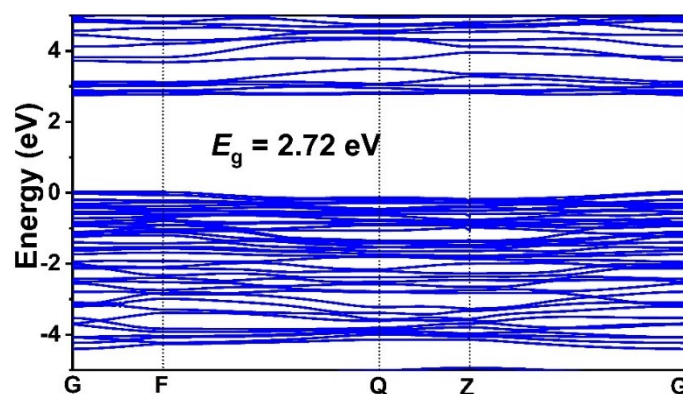

**Fig. S1** Electronic band structure of PBE calculation
